# Supplementary material for: Genetic variation in the HLA-G 3′UTR 14–bp insertion/deletion and the associated cancer risk: evidence from 25 case–control studies
Source: PubMed Central journal article supplement (PMC6509057; doi:10.1042/bsr20181991), 2019-05-10
Supplement: bsr20181991_Supp1.pdf [file bsr20181991_Supp1.pdf]

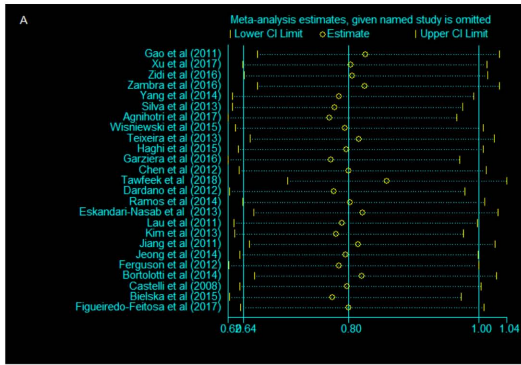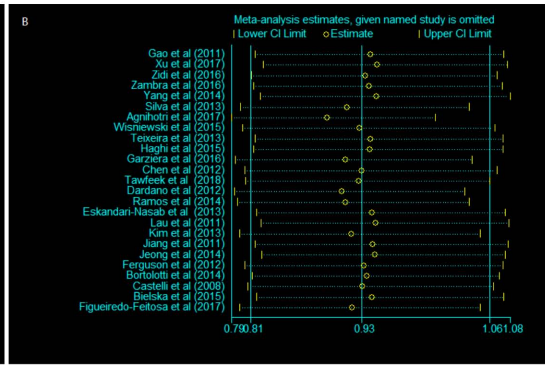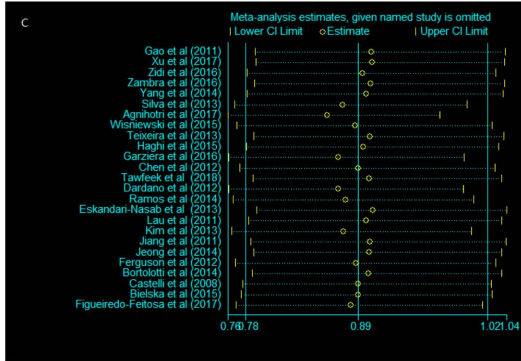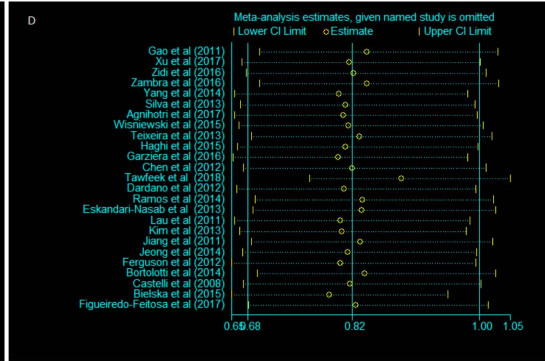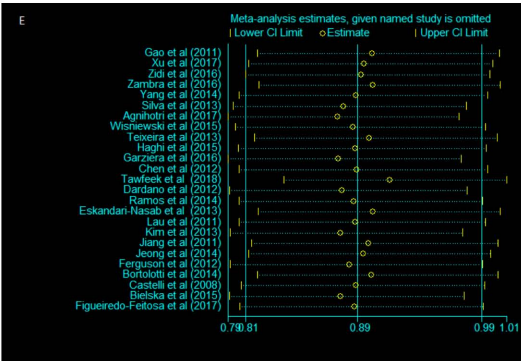

Supplemental Table 1 Methodological quality of the included studies according to the Newcastle-Ottawa Scale.

| Study                         | Selection<br>(score)                      | Representativeness of<br>patients cases | Selection of<br>controls | Definition of<br>control | Comparability<br>(score)                                   | Exposure<br>(score)          | Same method of<br>ascertainment for<br>participants | Non-response<br>Rate | Total<br>Score |
|-------------------------------|-------------------------------------------|-----------------------------------------|--------------------------|--------------------------|------------------------------------------------------------|------------------------------|-----------------------------------------------------|----------------------|----------------|
|                               | Adequate<br>definition of<br>patient case |                                         |                          |                          | Control for<br>important factor<br>or additional<br>factor | Ascertainment<br>of exposure |                                                     |                      |                |
| Gao et al [21]                | *                                         | *                                       | NA                       | *                        | *                                                          | *                            | *                                                   | NA                   | 6              |
| Xu et al [35]                 | *                                         | *                                       | *                        | *                        | **                                                         | *                            | *                                                   | NA                   | 8              |
| Zidi et al [36]               | *                                         | *                                       | *                        | *                        | **                                                         | *                            | *                                                   | NA                   | 8              |
| Zambra et al [37]             | *                                         | *                                       | NA                       | *                        | **                                                         | *                            | *                                                   | NA                   | 7              |
| Yang et al [22]               | *                                         | *                                       | NA                       | *                        | **                                                         | *                            | *                                                   | NA                   | 7              |
| Silva et al [38]              | *                                         | *                                       | NA                       | *                        | **                                                         | *                            | *                                                   | NA                   | 7              |
| Agnihotri et al [39]          | *                                         | *                                       | *                        | *                        | **                                                         | *                            | *                                                   | NA                   | 8              |
| Wisniewski et al<br>[40]      | *                                         | *                                       | *                        | *                        | **                                                         | *                            | *                                                   | NA                   | 8              |
| Teixeira et al [41]           | *                                         | *                                       | *                        | *                        | *                                                          | *                            | *                                                   | NA                   | 7              |
| Haghi et al [42]              | *                                         | *                                       | *                        | *                        | *                                                          | *                            | *                                                   | NA                   | 7              |
| Garziera et al [43]           | *                                         | *                                       | *                        | *                        | **                                                         | *                            | *                                                   | NA                   | 8              |
| Chen et al [44]               | *                                         | *                                       | NA                       | *                        | **                                                         | *                            | *                                                   | NA                   | 7              |
| Tawfeek et al [45]            | *                                         | *                                       | *                        | *                        | **                                                         | *                            | *                                                   | NA                   | 8              |
| Dardano et al [23]            | *                                         | *                                       | NA                       | *                        | **                                                         | *                            | *                                                   | NA                   | 7              |
| Ramos et al [11]              | *                                         | *                                       | NA                       | *                        | **                                                         | *                            | *                                                   | NA                   | 7              |
| Eskandari-Nasab<br>et al [46] | *                                         | *                                       | *                        | *                        | **                                                         | *                            | *                                                   | NA                   | 8              |
| Lau et al [24]                | *                                         | *                                       | *                        | *                        | **                                                         | *                            | *                                                   | NA                   | 8              |

|                                   |   |   |    |   |    |   |   |    |   |
|-----------------------------------|---|---|----|---|----|---|---|----|---|
| Kim et al [47]                    | * | * | NA | * | ** | * | * | NA | 7 |
| Jiang et al [13]                  | * | * | *  | * | ** | * | * | NA | 8 |
| Jeong et al [48]                  | * | * | NA | * | ** | * | * | NA | 7 |
| Ferguson et al [49]               | * | * | NA | * | ** | * | * | NA | 7 |
| Bortolotti et al [50]             | * | * | NA | * | ** | * | * | NA | 7 |
| Castelli et al [20]               | * | * | *  | * | ** | * | * | NA | 8 |
| Bielska et al [51]                | * | * | NA | * | ** | * | * | NA | 7 |
| Figueiredo-Feitos<br>a et al [52] | * | * | *  | * | ** | * | * | NA | 8 |

---

Supplemental table 2 The results of Begg's and Egger's tests for the publication bias

| Comparison type               | Publication bias               |                                |
|-------------------------------|--------------------------------|--------------------------------|
|                               | Begg's test ( <i>P</i> -value) | Egger's tes( <i>P</i> -value)t |
| Ins/Ins vs. Del/Del           | 0.168                          | 0.124                          |
| Ins/Del vs. Del/Del           | 0.559                          | 0.760                          |
| Ins/Ins vs. Ins/Del + Del/Del | 1.000                          | 0.816                          |
| Ins/Del + Ins/Ins vs. Del/Del | 0.168                          | 0.088                          |
| Ins vs. Del                   | 0.591                          | 0.207                          |
